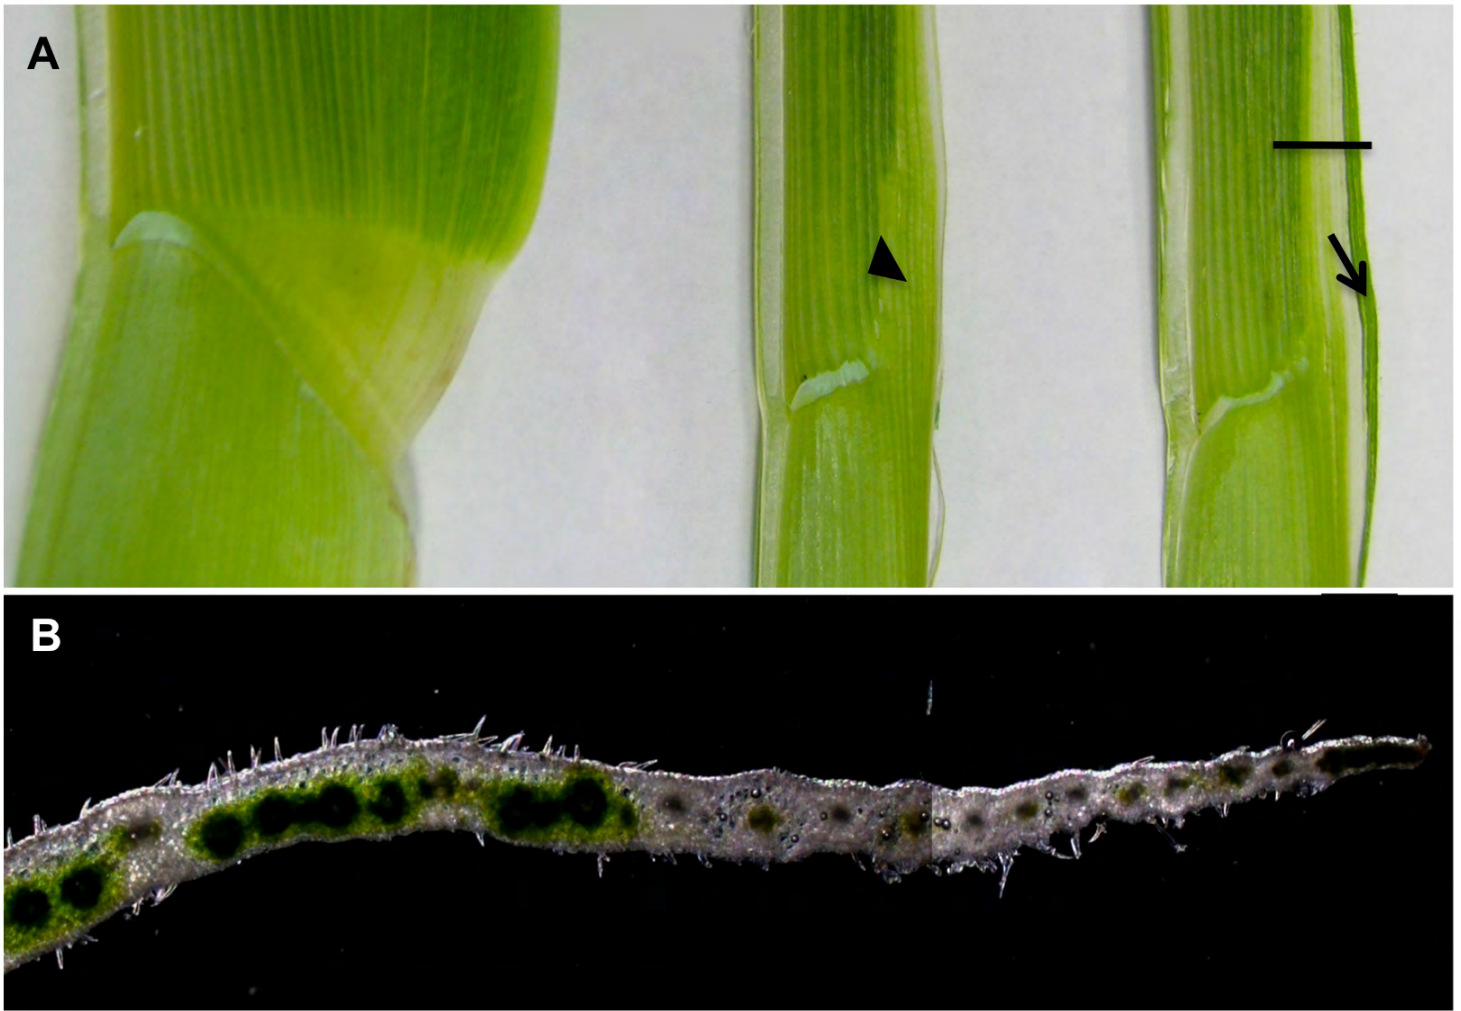

**Fig. S1. Marginal boundary is disrupted in *Lgn-R*.** (A) A wild-type leaf (left) compared with *Lgn-R/+* leaves. Sheath tissue extends into the blade (arrowhead) or blade tissue invades the sheath (arrow) indicating that the blade-sheath boundary is not established properly at this region. (B) Cross section of the area marked in A.

**A**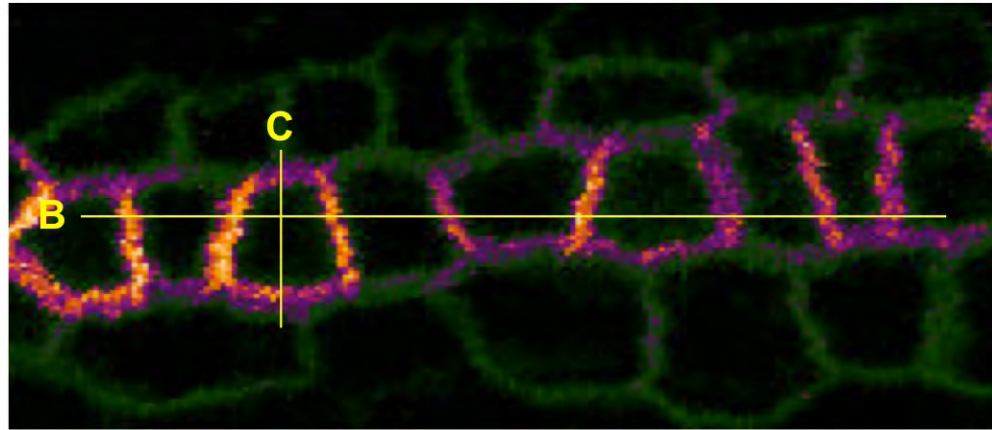**B**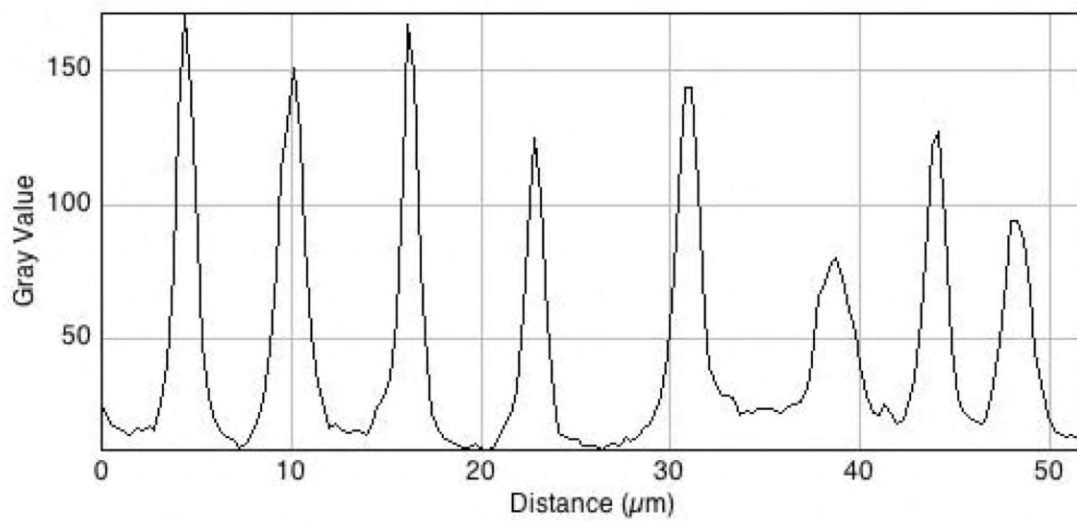**C**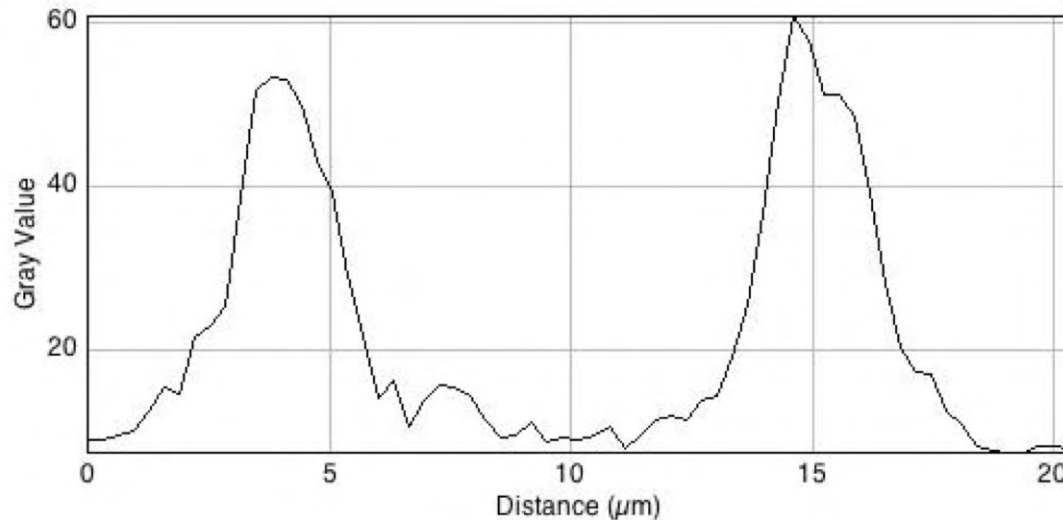

**Fig. S2. ZmPIN1a is localized to the lateral membranes of the preligule cells.** (A) Epidermal expression of the ZmPIN1a at the preligular band. The yellow lines indicate the axes along which analysis was carried out (shown in B and C). (B) The image shown in A was processed with ImageJ to calculate the intensity of ZmPIN1a along the median-lateral axis. (C) Representative plot of the intensity of ZmPIN1a along the proximal-distal axis. The y-axis shows the intensity of the signal. Comparing the intensity in B and C indicates that ZmPIN1a is polarized towards the lateral membranes.

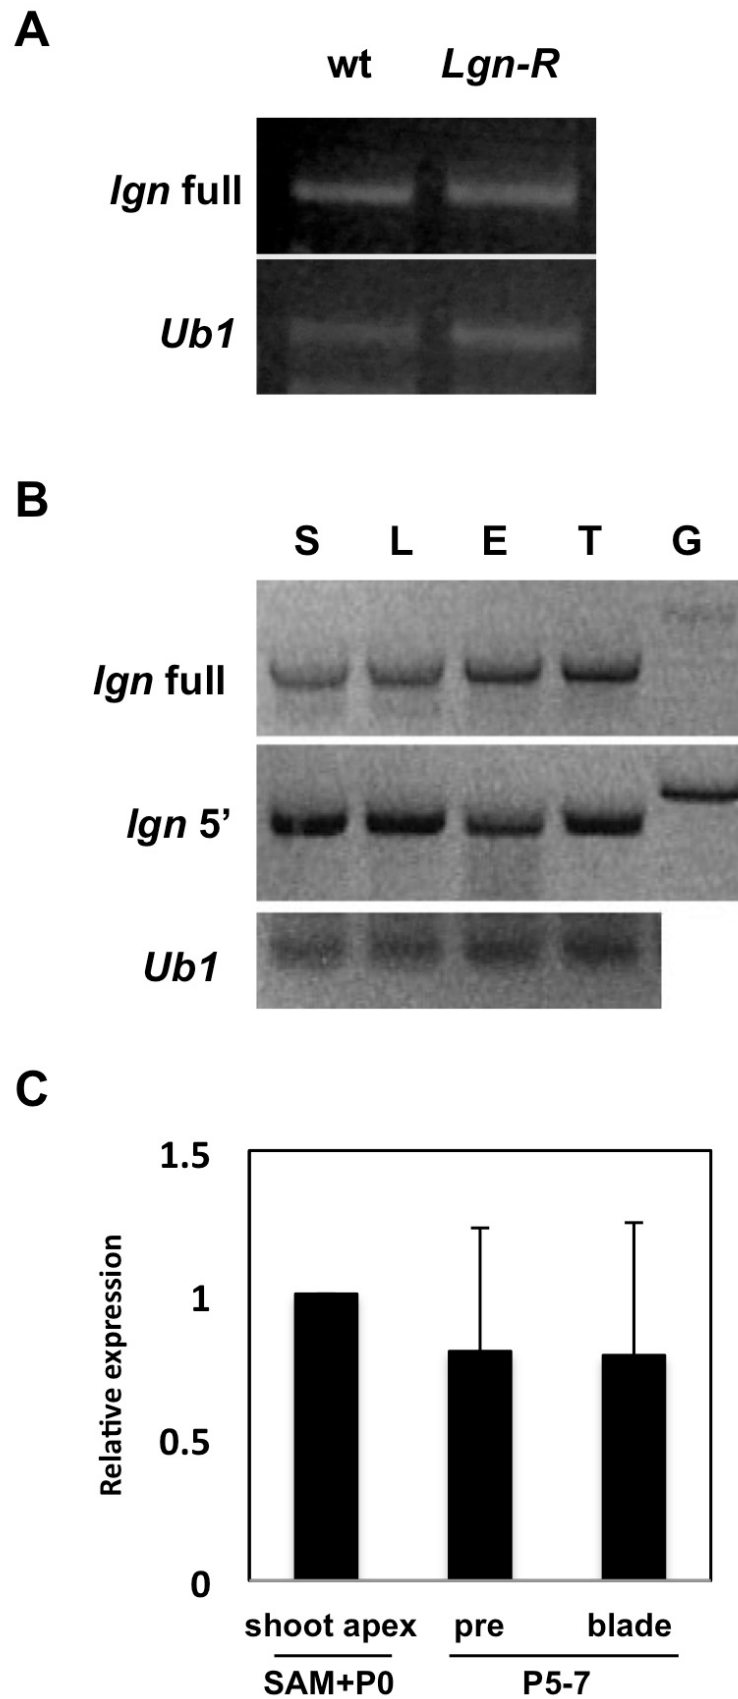

**Fig. S3. *lgn* is broadly expressed during development.** (A) *lgn* expression remains unchanged in *Lgn-R*. (B) *lgn* is expressed in various tissues. S, SAM; L, immature leaves; E, immature ears; T, immature tassels; G, genomic DNA. (C) *lgn* is expressed in different leaf domains.
